# Supplementary material
Source: PubMed Central journal article supplement (PMC6664810)

**Figure S1. Consort diagram for study inclusion and analysis**

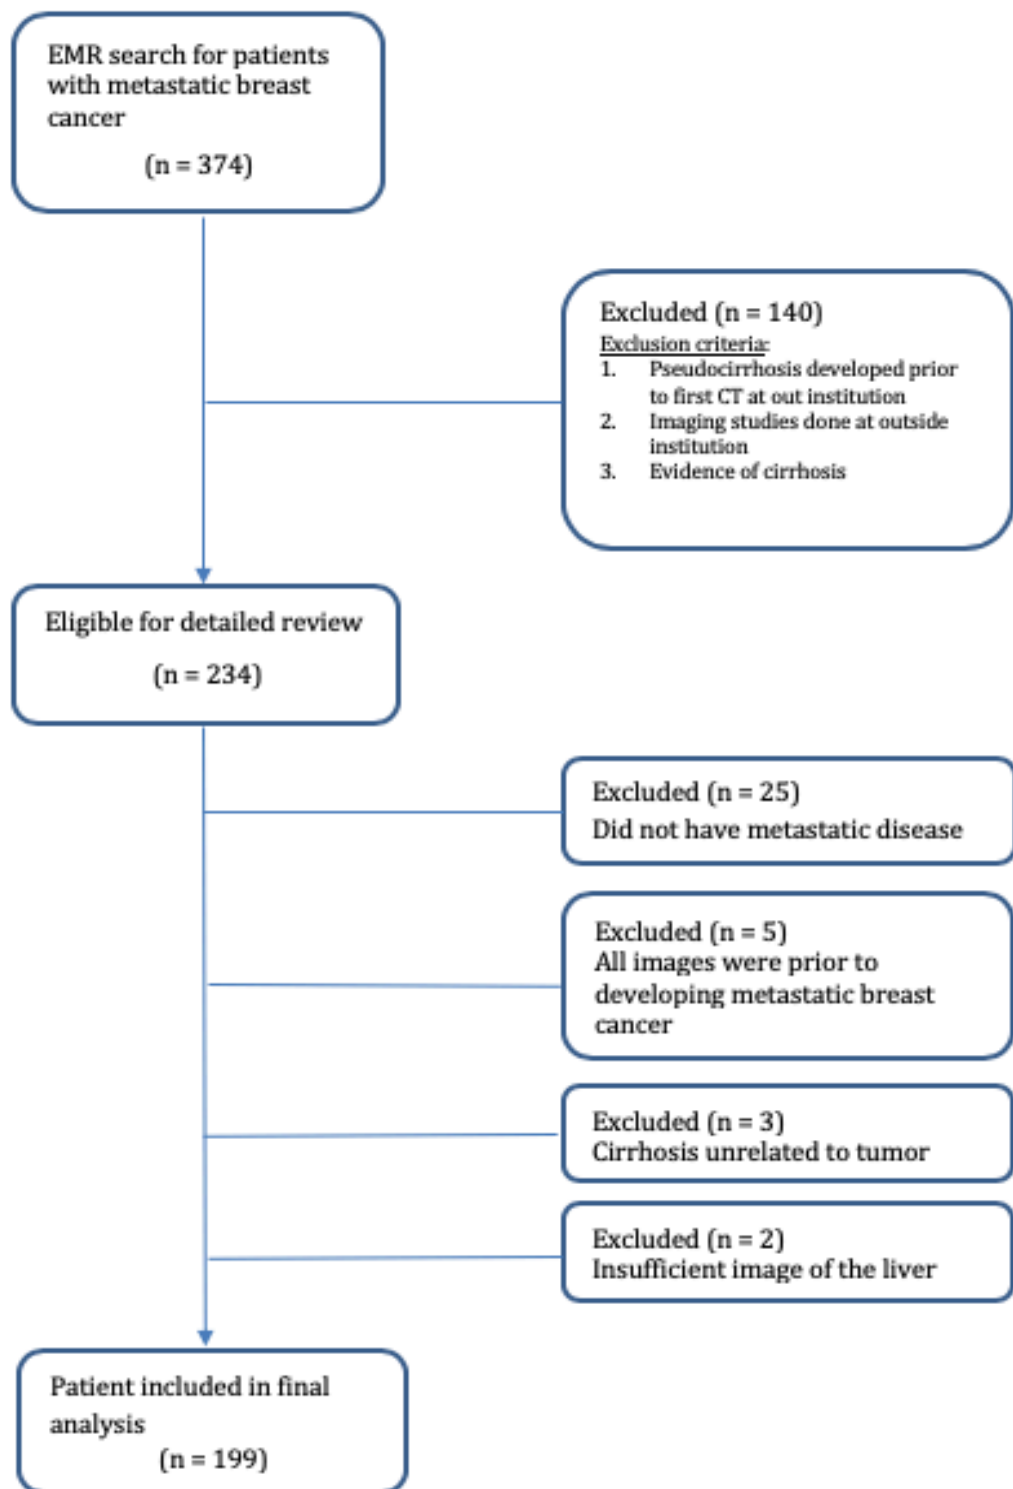

Supplement: NIHMS1531346-supplement-1.pdf [file NIHMS1531346-supplement-1.pdf]
